# Supplementary material for: Effect of microwave irradiation on carbon nanotube fibers: exfoliation, structural change and strong light emission
Source: Royal Society of Chemistry journal article supplement (doi:10.1039/c4ra01203h), 2014-01-01

### Supporting information

Figure S1. TEM images of various products present in the samples of CNTs after microwave irradiation. (a) Well crystallized MWCNTs. (b) Carbon flakes collected from CNT bundles. (c) Carbon flakes collected from quartz tube.

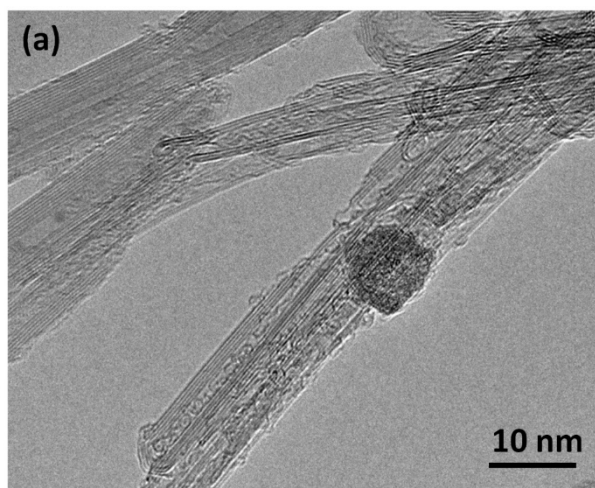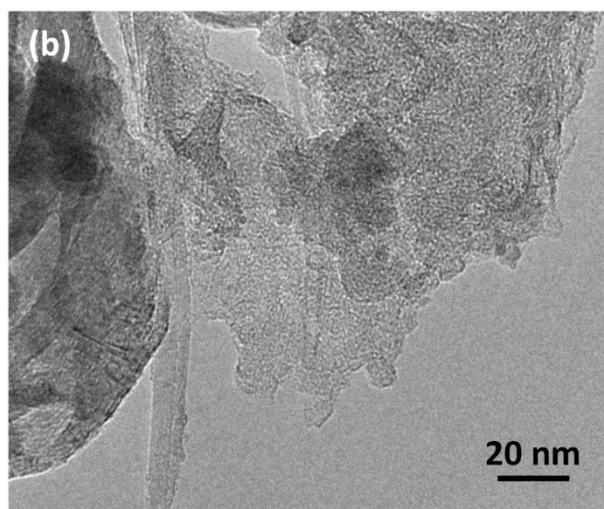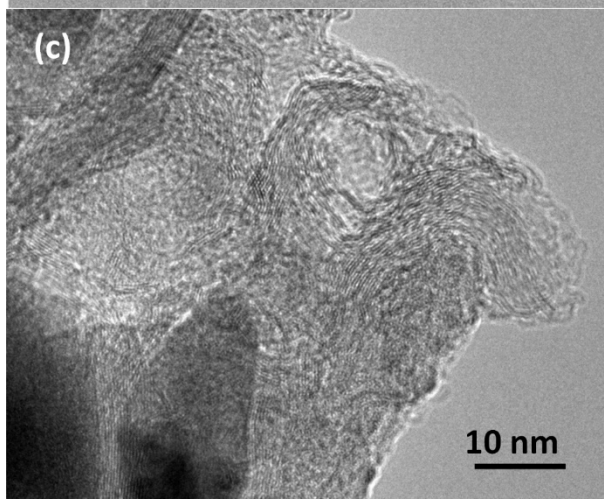

Supplement: c4ra01203h1.pdf [file c4ra01203h1.pdf]
